## RESEARCH ARTICLE

# Alcohol as a risk factor for hearing loss: A systematic review and meta-analysis

Peiyi Qian<sup>1</sup>, Zhixin Zhao<sup>2</sup>, Shuangyan Liu<sup>3</sup>, Jiarui Xin<sup>4</sup>, Yun Liu<sup>1</sup>, Yinzhu Hao<sup>1</sup>, Yaxin Wang<sup>1</sup>, Lei Yang<sup>1\*</sup>

**1** School of Public Health, Hangzhou Normal University, Hangzhou, Zhejiang, China, **2** Hangzhou Hospital for the Prevention and Treatment of Occupational Disease, Hangzhou, Zhejiang, China, **3** School of Public Health, Tongji Medical College, Huazhong University of Science and Technology, Wuhan, Hubei, China, **4** National Institute of Occupational Health and Poison Control, Chinese Center for Disease Control and Prevention, Beijing, China

\* [yanglei62@hznu.edu.cn](mailto:yanglei62@hznu.edu.cn)

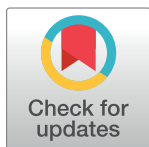

## Abstract

### Objective

Growing evidence suggests that alcohol consumption is a risk factor for hearing loss; however, the evidence has been inconsistent. This systematic review and meta-analysis aimed to evaluate the effect of alcohol consumption on hearing loss.

### Methods

We searched several databases up to November 2021, for published articles using the keywords “alcohol drinking” and “hearing loss”. Two investigators independently conducted the study selection and data extraction. Based on the results of the heterogeneity analysis ( $Q$  statistic and  $I^2$  statistic), a fixed- or random-effects model was used to calculate the pooled odds ratios (ORs). Subgroup and sensitivity analyses were performed to assess the potential sources of heterogeneity and robustness of the pooled estimation. Publication bias in the literature was evaluated using Egger’s test.

### Results

In total, 18 (9 cross-sectional, 5 case-control, and 4 cohort) observational studies were identified in this search; 27,849 participants were included. Compared with non-drinkers, the pooled OR of drinkers was 1.22 (95% confidence interval: 1.09–1.35).

### Conclusion

Evidence suggests a positive association between alcohol consumption and hearing loss. Drinkers were at a higher risk than non-drinkers. Drinking limitations may be useful for preventing hearing loss.

## OPEN ACCESS

**Citation:** Qian P, Zhao Z, Liu S, Xin J, Liu Y, Hao Y, et al. (2023) Alcohol as a risk factor for hearing loss: A systematic review and meta-analysis. *PLoS ONE* 18(1): e0280641. <https://doi.org/10.1371/journal.pone.0280641>

**Editor:** Mashallah Rezakazemi, Shahrood University of Technology, ISLAMIC REPUBLIC OF IRAN

**Received:** April 18, 2022

**Accepted:** January 4, 2023

**Published:** January 20, 2023

**Copyright:** © 2023 Qian et al. This is an open access article distributed under the terms of the [Creative Commons Attribution License](https://creativecommons.org/licenses/by/4.0/), which permits unrestricted use, distribution, and reproduction in any medium, provided the original author and source are credited.

**Data Availability Statement:** All relevant data are within the paper and its [Supporting Information](#) files.

**Funding:** The authors received no specific funding for this work

**Competing interests:** The authors have declared that no competing interests exist.

## Introduction

Hearing loss is a chronic and disabling sensory disorder and a major public health concern worldwide. The latest estimates reveal that hearing loss currently affects 1.59 billion people worldwide, which is 20.3% of the global population, of whom 430 million (5.5%) have moderate or severe hearing loss [1]. By 2050, the number of people with hearing loss is anticipated to reach nearly 2.5 billion, of whom 700 million will require interventions [2]. When unaddressed, hearing loss has an extensive negative effect on both individuals and society. According to statistics, hearing loss was ranked as the third leading cause of global years lived with disability in 2019 [2], affecting people's quality of life, communication, cognition, education, employment, and social participation [3–7]. At the societal level, unaddressed hearing loss poses an enormous economic burden, estimated to be more than US \$750 billion per year globally [8].

The occurrence and development of hearing loss is multifactorial and is a long-term and chronic process. In addition to noise exposure, other factors such as genes (*CAT*, *HSP70*, *CDH23*, *CASP*, *NOX3*, and *NRN1*) [9–12], environmental factors [13, 14], and individual lifestyles [15, 16] (smoking frequency, physical exercise, use of protective devices) may be independent factors or have a synergistic effect with noise to increase the risk of hearing loss.

Alcohol consumption is a common modifiable risk factor for many health problems, such as liver cancer and cardiovascular diseases [17–19]; additionally, its association with hearing loss has been inconclusive in previous studies. Shrestha [20] Lao [21], and Park [22] found that alcohol consumption was a risk factor for hearing loss, while Curhan's [23] research showed that alcohol consumption was not significantly related to hearing loss. Some studies found a protective effect of proportionate drinking against hearing loss, which was explained to be similar to the cardioprotective effects of alcohol [24, 25]. These results were inconsistent, mainly owing to differences in study population, age, sex, sample size, hearing loss examination, definition of "alcohol drinking," or other confounding factors.

Therefore, we conducted a systematic review and meta-analysis to investigate and quantify the association between alcohol consumption and hearing loss. We reduced the conceptual heterogeneity by including only observational cross-sectional, case-control, and cohort studies that assessed hearing loss using pure-tone audiometry. And, we conducted exploratory subgroup analyses to examine possible explanations for heterogeneity owing to demographics, study type, hearing loss type, and analysis factors.

## Materials and methods

### Literature search strategy

This meta-analysis was performed according to the PRISMA guidelines [26]. We carried out a literature search up to November 30, 2021, in Embase, PubMed, Web of Science, Wanfang, Weipu, and CNKI databases for studies published in English and Chinese using the Medical Subject Headings terms "alcohol drinking" and "hearing loss", and their with related words, following the Meta-analysis of Observational Studies under Epidemiology guidelines [27]. Two reviewers independently screened the potential publication titles and reviewed the full text of the eligible articles. The review has been pre-registered with PROSPERO (CRD 42021247735).

### Inclusion and exclusion criteria

The inclusion criteria for relevant articles used in this systematic review were as follows: (1) cohort-based, case-control, or cross-sectional study; (2) studies that investigated the risk of

hearing loss in drinkers; (3) studies that identified hearing loss by pure-tone average; and (4) studies that provided odds ratio (OR) or relative risk (RR) with the corresponding 95% confidence interval (CI).

The exclusion criteria were as follows: (1) studies in the format of reviews, editorials, master and doctoral dissertations, and abstracts; (2) studies with a small sample size ( $n < 30$ ); (3) studies whose subjects were children ( $< 15$  years old); (4) studies in which the outcome was sudden deafness; (5) studies that middle ear disease was identified by a test of tympanometry or bone conduction.

### Data extraction and quality assessment

The following information from the selected studies was independently extracted by two investigators: principal author, year of publication, study design, number of subjects, sex and age of participants, country, information about the alcohol consumption, diagnostic criteria of hearing loss, adjusted OR/RR with 95% CIs, adjusting or matching variables, and statistical analyses. Noise-Induced Hearing Loss (NIHL) [28] is caused by prolonged exposure to noise, it is characterized as sensorineural hearing loss and is usually bilateral, irreversible, and progressive while the exposure to noise continues. Age-related hearing loss (ARHL) [29] is a complex disorder that results from the cumulative effects of aging on the auditory system. It is defined as a progressive, bilateral, symmetrical age-related sensorineural hearing loss, which is most pronounced at the higher frequencies. When multiple reports were published in the same study, we only considered the most informative one in this meta-analysis. The most fully adjusted OR/RR was chosen when several estimates for the same exposure were reported with different adjustment levels.

The methodological quality of the included cross-sectional studies was assessed using the 11-item checklist recommended by the Agency for Healthcare Research and Quality. The article quality was assessed as follows: low quality = 0–3, moderate quality = 4–7, and high quality = 8–11. The quality of the included cohort and case-control studies was assessed using the Newcastle-Ottawa Scale (NOS); the rating criteria for the NOS were as follows: Low quality = 1–5, medium quality = 6–7, and high quality = 8–9 [30].

### Statistical analysis

OR was used to measure the association between alcohol consumption and hearing loss. Owing to the low incidence of hearing loss, the reported RR was approximately considered as an OR. When the OR was reported separately at different drinking levels, we extracted the highest level of results. One study separately estimated the OR and 95% CI in men and women, and it was treated as a different study in the analysis. Prior to merging the overall pooled ORs, the Q test and  $I^2$  test were performed to evaluate heterogeneity. When the Q test  $P$ -value was more than 0.10 or the  $I^2$  value was less than 50%, the ORs were pooled according to the fixed-effects model. Otherwise, a random effects model was applied [31]. Forest plots were generated for alcohol drinkers versus nondrinkers. Subgroup analyses were based on study design, mean age, sex, publication year, population type, hearing loss type, and region to investigate potential sources of heterogeneity. We also performed a sensitivity analysis by removing each individual study from the meta-analysis and recalculating the summary risk estimate. Moreover, we used qualitative visual inspection of funnel plots and quantitative Begg's tests to assess publication bias for the risk of hearing loss. All reported  $P$  values were two-sided, and  $P < 0.05$  was considered statistically significant for all included studies. Statistical analyses were performed using Stata/MP version 16.0 (StataCorp, College Station, TX, USA).

## Results

### Literature research and study characteristics

Fig 1 presents the details of the literature search. First, 715 articles were identified. Of these, 615 articles were excluded based on the information provided in the title and abstract. After retrieving and reviewing 100 full articles, we excluded 82, of which 28 were irrelevant to our research. Seven studies were excluded because the participants had not been evaluated using pure-tone audiometry to confirm hearing loss. In addition, 39 studies did not provide an effect size estimate or 95% CIs to calculate the pooled OR. One study hypothesized that drinking aggravates preexisting middle ear diseases and was excluded. Seven meta-analyses, reviews, and abstracts were excluded. One article from Korea, from 2017 and another from 2019 used data from the same public database, the Korea National Health and Nutrition Examination

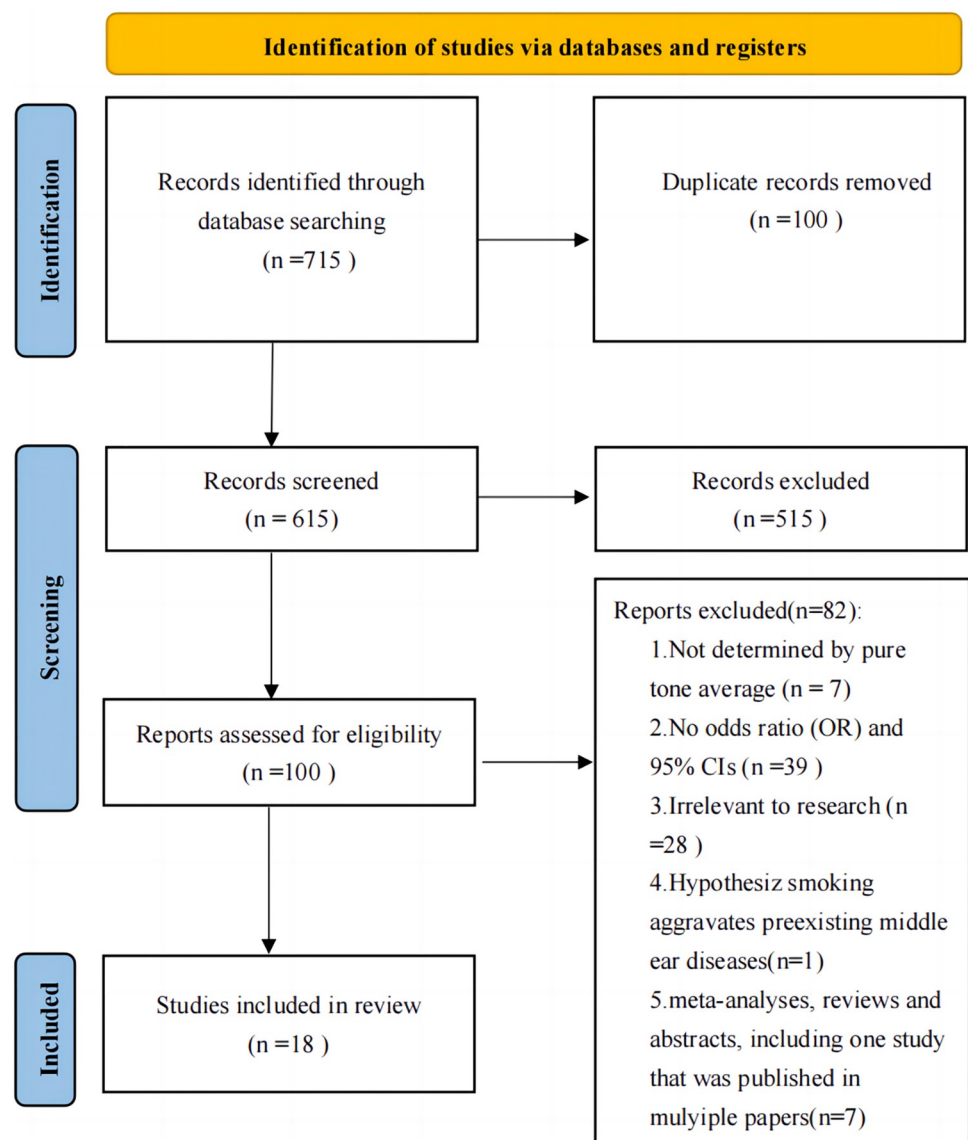

**Fig 1. Flow chart of the selection of studies on alcohol consumption and risk of hearing loss included in the systematic review and meta-analysis.** *Note.* Abbreviations: CI, confidence interval; OR, odds ratio.

<https://doi.org/10.1371/journal.pone.0280641.g001>

Surveys (KNHANES), and the two may have had a high degree of data overlap. The methods and content of the two articles were fully compared, the article from 2019 was better and retained. Finally, 18 articles met our initial inclusion criteria.

The main characteristics of the 18 selected studies, comprising 27,849 participants, are presented in [Table 1](#). There were four cohort studies, five case-control studies, and nine cross-sectional studies. Fourteen studies were from Asia and four were from non-Asian regions. Twelve studies included both men and women, five studies involved men, and one study involved women only. All the studies described a method for the assessment of hearing impairment. Some studies (9 studies) used 25 dB as the hearing impairment threshold, eight studies used 40 dB, and one study used 30 dB. In addition, the quality assessment scores for the four cohort studies were in the range of 6–9. For the five case-control studies, the scores were in the range of 6–8. The nine cross-sectional studies had scores ranging from 6 to 10.

### Association between alcohol consumption and risk of hearing loss

In total, 19 studies (18 plus one article that separately estimated OR and 95% CI in men and women) assessed the association between alcohol consumption and the risk of hearing loss. Among the 19 studies, nine reported a positive relationship between alcohol consumption and the risk of hearing loss, while 10 found no association. [Fig 2](#) shows the forest plots for alcohol consumption and hearing loss risk. The pooled OR of hearing loss for drinkers was 1.22 (95% CI: 1.09–1.35), with moderate heterogeneity across studies (Q test  $P = 0.032$ .  $I^2 = 41.2\%$ ).

### Subgroup analyses

[Table 2](#) shows the results of the subgroup analysis for alcohol consumption and hearing loss risks. The study design, sex, mean age, publication year, population type, hearing loss type, and region were included in the subgroup analysis. Overall, the results for most subgroups indicated a positive relationship between alcohol consumption and risk of hearing loss. Our subgroup analysis revealed a statistically significant positive association between alcohol consumption and hearing loss risks, especially among studies conducted in men (OR = 1.56; 95% CI, 1.12–2.01), studies whose participants had a lower average age (OR = 1.46; 95% CI, 1.27–1.66), current studies (from 2010 onwards OR = 1.48; 95% CI, 1.28–1.67), studies of professional populations (OR = 1.41; 95% CI, 1.22–1.59), and studies conducted in Asia (OR = 1.42; 95% CI, 1.24–1.60). In addition, heterogeneity was reduced in these seven subgroups analyses.

### Sensitivity analysis and publication bias

A sensitivity analysis was performed to investigate the source of heterogeneity. Sensitivity analysis showed that the pooled effect sizes obtained for the association of alcohol consumption with the risk of hearing loss did not depend on the individual study.

The funnel plot was used to examine publication bias in the association between alcohol consumption and hearing loss. The graph appears to be symmetrical, and a few studies fall outside the dotted line, suggesting the absence of publication bias. Moreover, we found no publication bias according to Egger's regression test (Egger's  $P = 0.144$ ).

### Discussion

A meta-analysis of 18 studies published over the past 25 years showed a significant relationship between alcohol consumption and hearing loss. Compared to non-drinkers, the risk of developing hearing loss increased 1.22-fold among drinkers. Although heterogeneity was moderate in our analysis ( $I^2 = 41.2\%$ ,  $P = 0.032$ ), subgroup analysis was conducted to explore the sources

**Table 1. Main characteristics of 18 included studies on drinking and hearing loss risk.**

| Principal Author and Year | research type   | Country   | Sex   | N                           | Age                     | Alcohol information                  | Diagnostic Criteria of HL       | Statistical analysis                    | Adjusting or Matching Variables                                                                         | Quality Assessment |
|---------------------------|-----------------|-----------|-------|-----------------------------|-------------------------|--------------------------------------|---------------------------------|-----------------------------------------|---------------------------------------------------------------------------------------------------------|--------------------|
| Brant, 1996 [32]          | Cohort          | America   | Men   | 531                         | >50                     | none, moderate, high                 | PTA <sub>0.5,1,2,3</sub> >30dB  | A proportional hazards regression model | age, smoking, alcohol consumption                                                                       | 7                  |
| Gopinath, 2010 [33]       | Cohort          | Australia | Both  | 2815                        | 66.6 ±9.3               | none, 1,>1 but ≤2, and >2 drinks/day | PTA <sub>0.5,1,2,4</sub> >25dB  | Logistic regression                     | age, sex, family history of hearing loss, occupational noise, history of diagnosed stroke, and diabetes | 9                  |
| Li, 2008 [34]             | Cohort          | China     | Men   | Exposed 244/<br>control 140 | <40.0                   | annual alcohol consumption           | PTA >25dB                       | Ordered multi-class logistic regression | NA                                                                                                      | 6                  |
| Guo, 2016 [35]            | Cohort          | China     | Men   | 819                         | 31.8 ±5.1               | 0, 0<n<5, 5≤n<10, 10≤n<15, ≥15       | PTA <sub>4,6,8</sub> >40 dB     | Logistic regression                     | NA                                                                                                      | 7                  |
| Jiao, 2016 [36]           | Case-control    | China     | Both  | Case 187/<br>control 187    | 39                      | drinker, non-drinker                 | PTA <sub>3,4,6</sub> >40 dB     | Conditional Logistics analysis          | NA                                                                                                      | 8                  |
| Itoh, 2001 [37]           | Case-control    | Japan     | Both  | Case 496/<br>control 2807   | 63.7                    | never, past, light, heavy            | PTA <sub>4</sub> >40dB          | multiple logistic regression            | sex, age, BMI, %VC, hemoglobin, TC, FPG, AST, ALT, and g-GTP                                            | 8                  |
| Ni, 2019 [38]             | Case-control    | China     | Both  | Case 747/<br>Control 789    | 33.1                    | drinker, non-drinker                 | PTA >40 dB                      | Logistic regression                     | NA                                                                                                      | 6                  |
| Bai, 2018 [39]            | Case-control    | China     | Both  | Case 519/<br>control 111    | 34.1 ±9.2               | drinker, non-drinker                 | PTA >25dB                       | Logistic regression                     | NA                                                                                                      | 7                  |
| Shen, 2013 [40]           | Case-control    | China     | Men   | case 201/<br>control 294    | 42.8 ±7.9/<br>39.1 ±9.7 | drinker, non-drinker                 | PTA <sub>3,4,6</sub> >40 dB     | Multiple regression                     | age, smoking, alcohol                                                                                   | 7                  |
| Shrestha, 2011 [20]       | Cross-sectional | Australia | Both  | 110                         | 29.8                    | drinker, non-drinker                 | PTA >25dB                       | Chi-square test                         | NA                                                                                                      | 7                  |
| Popelka, 2000 [41]        | Cross-sectional | America   | Both  | 3571                        | 65.6                    | never, past, current                 | PTA <sub>4,6,8</sub> >40 dB     | multiple logistic regression            | age, sex, education, smoking, occupational noise exposure, alcohol consumption                          | 9                  |
| Chen, 2020 [42]           | Cross-sectional | China     | Men   | 3655                        | 22.3 ±3.1               | 0, 1–2, 3–4 and >5 drinks/week       | PTA <sub>3,4,6</sub> >25 dB     | multiple logistic regression            | NA                                                                                                      | 7                  |
| Zou, 2018 [43]            | Cross-sectional | China     | Both  | 808                         | 38.5                    | drinker, non-drinker                 | PTA <sub>3,4,6</sub> >25 dB     | Logistic regression                     | NA                                                                                                      | 9                  |
| Sun, 2014 [44]            | Cross-sectional | China     | Men   | 471                         | 39.75 ±6.58             | drinker, non-drinker                 | PTA <sub>3,4,6</sub> >40 dB     | Logistic regression                     | NA                                                                                                      | 7                  |
| Gao, 2019 [45]            | Cross-sectional | China     | Both  | 389                         | 62.7 ±4.9               | drinker, non-drinker                 | PTA <sub>0.5,1,2,4</sub> >40 dB | multiple logistic regression            | NA                                                                                                      | 6                  |
| Park, 2019 [22]           | Cross-sectional | Korea     | Both  | Men (1525)<br>Women (2335)  | >20.0                   | drinker, non-drinker                 | PTA <sub>0.5,1,2,4</sub> >40 dB | logistic regression analyses            | age                                                                                                     | 10                 |
| Xu, 2021 [46]             | Cross-sectional | China     | Women | 1416                        | 60.8 ±9.0               | drinker, non-drinker                 | PTA <sub>0.5,1,2,4</sub> >25dB  | logistic regression analyses            | education and SBP, older age, alcohol, consumption, and menopausal history                              | 8                  |

(Continued)

Table 1. (Continued)

| Principal Author and Year | research type   | Country | Sex  | N    | Age       | Alcohol information  | Diagnostic Criteria of HL  | Statistical analysis         | Adjusting or Matching Variables                                                                                    | Quality Assessment |
|---------------------------|-----------------|---------|------|------|-----------|----------------------|----------------------------|------------------------------|--------------------------------------------------------------------------------------------------------------------|--------------------|
| Wang, 2021 [47]           | Cross-sectional | China   | Both | 2280 | 35.0 ±8.4 | drinker, non-drinker | PTA <sub>3,4,6</sub> >25dB | logistic regression analyses | sex, age, CNE, BMI, HPD usage, community noise exposure, personal earphone usage, smoking, and alcohol consumption | 8                  |

**Note.** Abbreviations: HL, hearing loss; PTA, pure tone average; NA, non-adjusted variables; dB, decibels; SBP, systolic blood pressure; CNE, cumulative noise exposure; BMI, body mass index; HPD, hearing protection device.

<https://doi.org/10.1371/journal.pone.0280641.t001>

of heterogeneity. The results for most subgroups indicated a positive relationship between alcohol consumption and the risk of hearing loss, and heterogeneity was reduced across these seven subgroups analyses. Sensitivity analysis showed that our results were robust, and there was no publication bias according to funnel plot and Egger’s analysis. In summary, these results suggest that alcohol consumption is an independent risk factor for hearing loss.

However, the specific mechanisms underlying alcohol consumption and hearing loss are unclear. In Curhan’s [23] prospective study, among those with lower levels of vitamin B12 intake, the consumption of higher levels of alcohol, specifically liquor (spirits), was associated

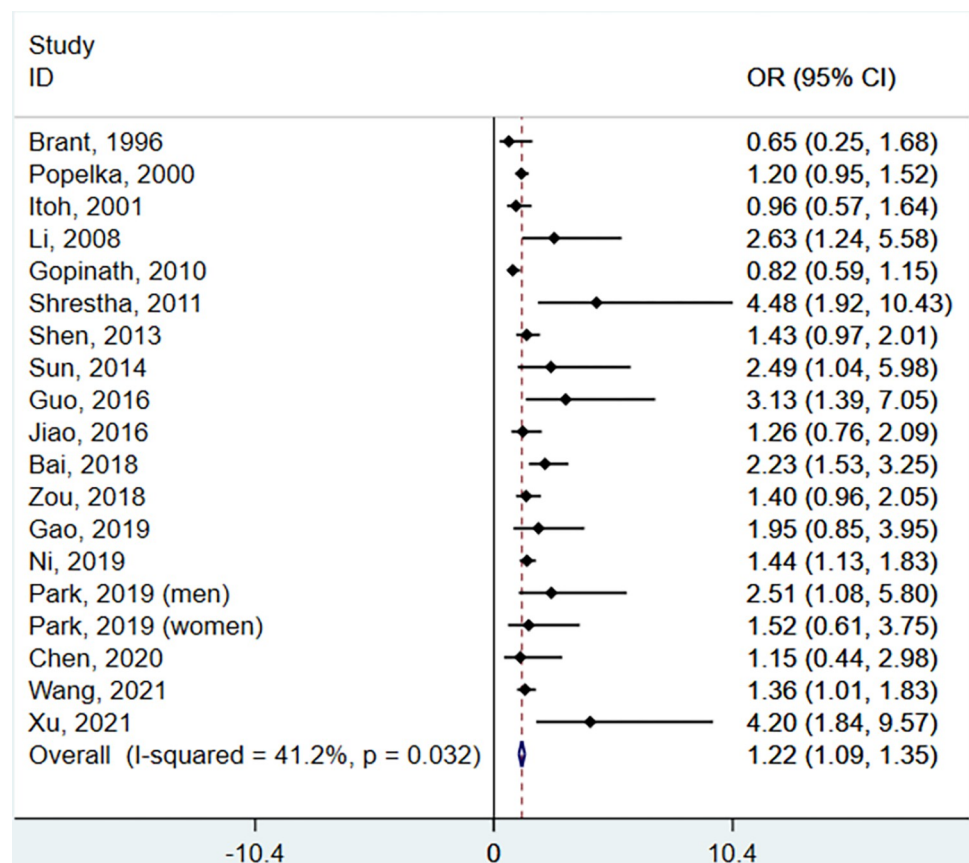

**Fig 2.** Summary estimates were calculated using fixed-effects models. **Note.** Abbreviations: CI, confidence interval; OR, odds ratio.

<https://doi.org/10.1371/journal.pone.0280641.g002>

Table 2. Subgroup analyses relating alcohol consumption and hearing loss.

| Subgroup                 | Numbers of studies | Pooled OR | 95% CI    | P Value for Q Test | I <sup>2</sup> (%) | P <sub>heterogeneity</sub> |
|--------------------------|--------------------|-----------|-----------|--------------------|--------------------|----------------------------|
| <b>Study design</b>      |                    |           |           |                    |                    |                            |
| Cohort                   | 4                  | 0.84      | 0.59–1.10 | 0.142              | 44.9               | 0.004                      |
| Case-control             | 5                  | 1.38      | 1.15–1.61 | 0.172              | 37.3               |                            |
| Cross-sectional          | 10                 | 1.32      | 1.12–1.53 | 0.569              | 0.0                |                            |
| <b>Sex</b>               |                    |           |           |                    |                    |                            |
| Both                     | 11                 | 1.18      | 1.04–1.32 | 0.017              | 53.8               | 0.180                      |
| Men                      | 6                  | 1.56      | 1.12–2.01 | 0.559              | 0.0                |                            |
| Women                    | 2                  | 1.90      | 0.44–3.35 | 0.207              | 37.2               |                            |
| <b>Mean age</b>          |                    |           |           |                    |                    |                            |
| <50                      | 11                 | 1.46      | 1.27–1.66 | 0.530              | 0.0                | 0.001                      |
| ≥50                      | 8                  | 1.01      | 0.84–1.19 | 0.164              | 33.0               |                            |
| <b>Publication year</b>  |                    |           |           |                    |                    |                            |
| >2010                    | 14                 | 1.48      | 1.28–1.67 | 0.616              | 0.0                | 0.000                      |
| <2010                    | 5                  | 0.99      | 0.81–1.17 | 0.159              | 39.3               |                            |
| <b>Population type</b>   |                    |           |           |                    |                    |                            |
| Occupation               | 12                 | 1.41      | 1.22–1.59 | 0.361              | 8.6                | 0.004                      |
| Community                | 7                  | 1.02      | 0.83–1.21 | 0.109              | 42.3               |                            |
| <b>Hearing loss type</b> |                    |           |           |                    |                    |                            |
| HL                       | 7                  | 1.30      | 1.03–1.57 | 0.347              | 10.8               | 0.000                      |
| NIHL                     | 9                  | 1.45      | 1.25–1.65 | 0.513              | 0.0                |                            |
| ARHL                     | 3                  | 0.83      | 0.59–1.06 | 0.789              | 0.0                |                            |
| <b>Region</b>            |                    |           |           |                    |                    |                            |
| Asian                    | 15                 | 1.42      | 1.24–1.60 | 0.501              | 0.0                | 0.005                      |
| Non-Asian                | 4                  | 0.97      | 0.60–1.34 | 0.073              | 56.9               |                            |

**Note.** Abbreviations: HL, hearing loss; NIHL, noise-induced hearing loss; ARHL, age-related hearing loss; OR, odds ratio; CI, confidence interval.

<https://doi.org/10.1371/journal.pone.0280641.t002>

with an increased risk of hearing loss. Owing to the important role of vitamin B12 in cell metabolism, vascular function, and myelin synthesis, vitamin B12 deficiency might lead to the occurrence of auditory system diseases [48]. Drinking too much alcohol depletes vitamin B12 in the liver, and this increases the possibility of hearing loss among drinkers [49]. Ribeiro's [50] study demonstrated that alcohol consumption mainly caused high-frequency hearing loss, and the abnormality in transient evoked otoacoustic emissions in drinkers suggested that alcohol consumption was liable to damage outer hair cells. In the central nervous system, alcohol consumption reduces excitatory neurotransmission (by modulating NMDA receptors) and enhances inhibitory neurotransmission (by modulating GABA receptors) [51], and cochlear hair cells are innervated by GABA efferent neurons, which might affect the normal function of inner hair cells through this pathway [52]. Kähkönen et al. [53] used neuromagnetic combined magnetoencephalography (MEG) and electroencephalography (EEG) study found that alcohol exerts widespread effects on the processing of sound and frequency changes, alcohol impairs sound and deviance detection bilaterally at the auditory cortex and involuntary attention shifting.

Interestingly, when we classified the study subjects by age, we found that alcohol consumption did not have a significant effect on hearing loss in the elderly, and the same finding was found for age-related hearing loss among the various types of hearing loss. Alcohol consumption had a positive correlation with noise-induced hearing loss, but there was no significant difference in age-related hearing loss. In a retrospective cohort study in China, the combined



effect of alcohol and noise was found to cause a greater risk of hearing loss (9.662) than the combination of the two independent variables: alcohol and noise (7.996), indicating that there may be synergistic effects of noise and alcohol consumption [34]. However, the biological mechanisms underlying the synergistic effects of noise exposure and alcohol consumption on hearing loss remain unclear. The specific reason may be related to the damage of the inner ear blood vessels, cochlear vestibular organs, and auditory nerves by both noise and alcohol consumption [54, 55]. However, age-related hearing loss could be influenced by alcohol consumption, involving several underlying mechanisms such as impairment of cochlear blood supply, resulting in hypoxia and ischemic damage, oxidative stress and associated mitochondrial dysfunction, loss of neurosensory cochlear cells, and neurodegeneration of the central auditory pathways [56, 57]. However, moderate alcohol intake may be protective against cochlear blood flow [58], promoting cytoprotection, and directly enhancing neuroprotective mechanisms that preserve hearing [59]. By contrast, alcohol intake may also adversely alter the central processing of auditory information [55, 56].

To properly interpret the results of the present study, it is necessary to consider several limitations. First, there was no standard definition of alcohol consumption, which was generally a subjective answer to the questionnaire. Some articles were classified by the type of alcohol consumed, others by the amount of alcohol consumed (and in different units of measurement), or simply as two categories, drinking and non-drinking. Due to the limited number of articles and the mixed classification methods, this study classified drinking into two categories: drinking and non-drinking (in this study, in the case of multiple classifications, the group with maximum alcohol consumption was considered as the drinking group). Second, the diagnostic criteria for hearing loss were inconsistent among the included studies. Some chose the average value in the high-frequency type (3,4,6 Hz) as the standard hearing loss threshold, and some were based on the speech-frequency type (0.5,1,2 Hz). Moreover, the hearing thresholds varied, which might have led to more heterogeneity. Third, to measure hearing acuity precisely, control of ambient noise level, the examiners' techniques, and the precision of the audiometer are important for good reproducibility. Although most of these studies described one or two of these important factors, the overall adjustment for these issues might not be sufficient. Finally, we did not examine the relationship between different alcohol dose levels and the risk of hearing loss because there was insufficient information about the dose-response relationship in this study.

Additional rigorous mega-cohort studies or large-scale randomized trials on the association between alcohol consumption and hearing loss are urgently required. Mega-cohort studies involving alcohol consumption habits are realistic and preferable but require several improvements. First, drinking behavior requires a standardized definition that includes at least three aspects: frequency of drinking, quantity of drinking per day, and episodes of heavy drinking. Fortunately, as early as 1993, the WHO developed and released a drinking questionnaire designed to quickly and easily detect drinkers with risky drinking patterns [60]. Subsequently, in 1998, Bush et al. [61] developed a more concise drinking questionnaire (AUDIT-C), which proved to be more representative and easier to use while screening large populations. The AUDIT-C is a user-friendly instrument that should be routinely included in epidemiological assessments, as it quantifies the frequency of drinking, the usual quantity of alcohol consumed per day, and the frequency of alcohol abuse. This is a good quantitative and uniform standard for future evidence of alcohol consumption. While large cohort studies are not easy to implement, we encourage rigorous implementation of pure tone audiometry rather than questionnaires to investigate hearing loss. Pure tone audiometry provides a more accurate estimate of whether the problem is in the left or right ear, whether hearing loss is high-frequency or speech-frequency, and the severity of hearing loss.

In conclusion, our systematic review and meta-analysis of available epidemiological studies found a positive association between alcohol consumption and hearing loss, suggesting that alcohol consumption may increase the risk of hearing loss. As some inherent limitations in the original studies were observed, no definitive conclusion could currently be drawn. We recommend that more well-designed prospective studies are needed to confirm the relationship between intake of alcohol and risk of hearing loss.

## Supporting information

**S1 Table. PRISMA 2020 checklist.**

(DOCX)

**S2 Table. Detailed search strategy.**

(DOCX)

**S1 Fig. Funnel plot with included 18 studies.**

(TIF)

## Acknowledgments

We would like to thank all authors who have contributed to this paper. We thank Editage ([www.editage.com](http://www.editage.com)) for English language editing.

## Author Contributions

**Data curation:** Peiyi Qian, Jiarui Xin, Yun Liu, Yinzhu Hao, Yaxin Wang.

**Formal analysis:** Peiyi Qian, Shuangyan Liu.

**Funding acquisition:** Peiyi Qian, Lei Yang.

**Methodology:** Peiyi Qian, Zhixin Zhao, Shuangyan Liu.

**Resources:** Lei Yang.

**Software:** Shuangyan Liu.

**Supervision:** Peiyi Qian, Lei Yang.

**Writing – original draft:** Peiyi Qian, Shuangyan Liu, Lei Yang.

**Writing – review & editing:** Peiyi Qian, Zhixin Zhao, Lei Yang.

## References

1. WHO. 1 in 4 people projected to have hearing problems by 2050.: WHO; [cited 2021 2021-03-02]. Available from: <https://www.who.int/news/item/02-03-2021-who-1-in-4-people-projected-to-have-hearing-problems-by-2050>.
2. Collaborators GHL. Hearing loss prevalence and years lived with disability, 1990–2019: findings from the Global Burden of Disease Study 2019. *Lancet*. 2021; 397(10278). [https://doi.org/10.1016/S0140-6736\(21\)00516-X](https://doi.org/10.1016/S0140-6736(21)00516-X) PMID: 33714390.
3. Olusanya BO, Davis AC, Hoffman HJ. Hearing loss: rising prevalence and impact. *Bulletin of the World Health Organization*. 2019; 97(10). <https://doi.org/10.2471/BLT.19.224683> PMID: 31656325.
4. LeClair KL, Saunders JE. Meeting the educational needs of children with hearing loss. *Bulletin of the World Health Organization*. 2019; 97(10):722–4. <https://doi.org/10.2471/BLT.18.227561> PMID: 31656339.
5. Kramer SE, Kapteyn TS, Kuik DJ, Deeg DJH. The association of hearing impairment and chronic diseases with psychosocial health status in older age. *J Aging Health*. 2002; 14(1):122–37. <https://doi.org/10.1177/089826430201400107> PMID: 11892756.

6. Dalton DS, Cruickshanks KJ, Klein BEK, Klein R, Wiley TL, Nondahl DM. The impact of hearing loss on quality of life in older adults. *Gerontologist*. 2003; 43(5):661–8. <https://doi.org/10.1093/geront/43.5.661> PMID: 14570962.
7. Lin FR. Hearing loss and cognition among older adults in the United States. *J Gerontol A Biol Sci Med Sci*. 2011; 66(10):1131–6. <https://doi.org/10.1093/gerona/glr115> PMID: 21768501.
8. Brown CS, Emmett SD, Robler SK, Tucci DL. Global Hearing Loss Prevention. *Otolaryngologic clinics of North America*. 2018; 51(3):575–92. <https://doi.org/10.1016/j.otc.2018.01.006> PMID: 29525388.
9. Li Y, Yu S, Gu G, Chen G, Zheng Y, Jiao J, et al. Polymorphisms of heat shock protein 70 genes (HSPA1A, HSPA1B and HSPA1L) and susceptibility of noise-induced hearing loss in a Chinese population: A case-control study. *PLoS one*. 2017; 12(2):e0171722. <https://doi.org/10.1371/journal.pone.0171722> PMID: 28182740.
10. Liu SY, Song WQ, Xin JR, Li Z, Lei S, Chen YQ, et al. NRN1 and CAT Gene Polymorphisms, Complex Noise, and Lifestyles interactively Affect the Risk of Noise-induced Hearing Loss. *Biomed Environ Sci*. 2021; 34(9):705–18. <https://doi.org/10.3967/bes2021.098> PMID: 34530960.
11. Zhang X, Ni Y, Liu Y, Zhang L, Zhang M, Fang X, et al. Screening of noise-induced hearing loss (NIHL)-associated SNPs and the assessment of its genetic susceptibility. *Environ Health*. 2019; 18(1):30. <https://doi.org/10.1186/s12940-019-0471-9> PMID: 30947719.
12. Zhao T, Wang Y, Li Z, Xu X, Lei S, Huang L, et al. Associations of noise kurtosis, genetic variations in NOX3 and lifestyle factors with noise-induced hearing loss. *Environ Health*. 2020; 19(1):13. <https://doi.org/10.1186/s12940-020-0566-3> PMID: 32014026.
13. Zhang J, Li C, Yin S, Wang Y, Zhou Y, Wang S, et al. Environmental exposure to organochlorine pesticides and its association with the risk of hearing loss in the Chinese adult population: A case-control study. *The Science of the total environment*. 2021; 767:145153. <https://doi.org/10.1016/j.scitotenv.2021.145153> PMID: 33636793.
14. Basner M, Babisch W, Davis A, Brink M, Clark C, Janssen S, et al. Auditory and non-auditory effects of noise on health. *Lancet*. 2014; 383(9925):1325–32. [https://doi.org/10.1016/S0140-6736\(13\)61613-X](https://doi.org/10.1016/S0140-6736(13)61613-X) PMID: 24183105.
15. Nakahori N, Sekine M, Yamada M, Tatsuse T, Kido H, Suzuki M. Association between self-reported hearing loss and low socioeconomic status in Japan: findings from the Toyama dementia survey. *BMC geriatrics*. 2020; 20(1):275. <https://doi.org/10.1186/s12877-020-01680-y> PMID: 32758156.
16. Tikka C, Verbeek JH, Kateman E, Morata TC, Dreschler WA, Ferrite S. Interventions to prevent occupational noise-induced hearing loss. *The Cochrane database of systematic reviews*. 2017; 7:CD006396. <https://doi.org/10.1002/14651858.CD006396.pub4> PMID: 28685503.
17. Seitz HK, Bataller R, Cortez-Pinto H, Gao B, Gual A, Lackner C, et al. Alcoholic liver disease. *Nat Rev Dis Primers*. 2018; 4(1):16. <https://doi.org/10.1038/s41572-018-0014-7> PMID: 30115921.
18. Im PK, Millwood IY, Kartsonaki C, Guo Y, Chen Y, Turnbull I, et al. Alcohol drinking and risks of liver cancer and non-neoplastic chronic liver diseases in China: a 10-year prospective study of 0.5 million adults. *BMC Med*. 2021; 19(1):216. <https://doi.org/10.1186/s12916-021-02079-1> PMID: 34530818.
19. Rosoff DB, Davey Smith G, Mehta N, Clarke T-K, Lohoff FW. Evaluating the relationship between alcohol consumption, tobacco use, and cardiovascular disease: A multivariable Mendelian randomization study. *PLoS Med*. 2020; 17(12):e1003410. <https://doi.org/10.1371/journal.pmed.1003410> PMID: 33275596.
20. Shrestha I, Shrestha BL, Pokharel M, Amatya RC, Karki DR. Prevalence of Noise Induced Hearing Loss among Traffic Police Personnel of Kathmandu Metropolitan City. *Kathmandu University medical journal (KUMJ)*. 2011; 9(36):274–8. Epub 2012/06/20. <https://doi.org/10.3126/kumj.v9i4.6343> PMID: 22710537.
21. Lao XQ, Yu IT, Au DK, Chiu YL, Wong CC, Wong TW. Noise exposure and hearing impairment among Chinese restaurant workers and entertainment employees in Hong Kong. *PLoS one*. 2013; 8(8):e070674. Epub 2013/08/27. <https://doi.org/10.1371/journal.pone.0070674> PMID: 23976950; PubMed Central PMCID: PMC3744581.
22. Park JA, Suh MJ. Hazardous Alcohol Consumption and the Risk of Hearing Impairment in Adults Based on the Korean National Health and Nutrition Survey: A Retrospective Study. *Journal of Audiology and Otology*. 2019; 23(2):63–8. <https://doi.org/10.7874/jao.2018.00241> WOS:000464235100001. PMID: 30727720
23. Curhan SG, Eavey R, Shargorodsky J, Curhan GC. 18 Prospective Study of Alcohol Use and Hearing Loss in Men. *Ear and Hearing*. 2011; 32(1):46–52. <https://doi.org/10.1097/AUD.0b013e3181f46a2f> WOS:000285581300006. PMID: 20802338
24. Dawes P, Cruickshanks KJ, Moore DR, Edmondson-Jones M, McCormack A, Fortnum H, et al. Cigarette smoking, passive smoking, alcohol consumption, and hearing loss. *Journal of the Association for*

- Research in Otolaryngology: JARO. 2014; 15(4):663–74. <https://doi.org/10.1007/s10162-014-0461-0> PMID: 24899378.
25. Choi Y-H, Park SK. Environmental Exposures to Lead, Mercury, and Cadmium and Hearing Loss in Adults and Adolescents: KNHANES 2010–2012. *Environ Health Perspect*. 2017; 125(6):067003. <https://doi.org/10.1289/EHP565> PMID: 28599263.
  26. Liberati A, Altman DG, Tetzlaff J, Mulrow C, Gøtzsche PC, Ioannidis JPA, et al. The PRISMA statement for reporting systematic reviews and meta-analyses of studies that evaluate healthcare interventions: explanation and elaboration. *BMJ*. 2009; 339:b2700. <https://doi.org/10.1136/bmj.b2700> PMID: 19622552.
  27. Stroup DF, Berlin JA, Morton SC, Olkin I, Williamson GD, Rennie D, et al. Meta-analysis of observational studies in epidemiology: a proposal for reporting. Meta-analysis Of Observational Studies in Epidemiology (MOOSE) group. *JAMA*. 2000; 283(15):2008–12. <https://doi.org/10.1001/jama.283.15.2008> PMID: 10789670.
  28. Metidieri MM, Rodrigues HFS, Filho FJMBdO, Ferraz DP, Neto AFdA, Torres S. Noise-Induced Hearing Loss (NIHL): literature review with a focus on occupational medicine. *International Archives of Otorhinolaryngology*. 2013; 17(2):208–12. <https://doi.org/10.7162/S1809-9772013000200015> PMID: 25992015.
  29. Bowl MR, Dawson SJ. Age-Related Hearing Loss. *Cold Spring Harbor Perspectives In Medicine*. 2019; 9(8). <https://doi.org/10.1101/cshperspect.a033217>
  30. Wells GA, Shea B, O'Connell D, Peterson J, Welch V, Losos M, et al. The Newcastle-Ottawa Scale (NOS) for assessing the quality if nonrandomized studies in meta-analyses Canada: Ottawa Health Research Institute; Ottawa, ON; 2010 [cited 2010]. Available from: [http://www.ohri.ca/programs/clinical\\_epidemiology/oxford.htm](http://www.ohri.ca/programs/clinical_epidemiology/oxford.htm).
  31. Higgins JPT, Thompson SG, Deeks JJ, Altman DG. Measuring inconsistency in meta-analyses. *BMJ*. 2003; 327(7414):557–60. <https://doi.org/10.1136/bmj.327.7414.557> PMID: 12958120.
  32. Brant LJ, Gordon-Salant S, Pearson JD, Klein LL, Morrell CH, Metter EJ, et al. Risk Factors Related to Age-Associated Hearing Loss in the Speech Frequencies. *J Am Acad Audiol*. 1996; 7(3):152–60. Epub 1996/06/01. PMID: 8780987.
  33. Gopinath B, Flood VM, McMahon CM, Burlutsky G, Smith W, Mitchell P. The Effects of Smoking and Alcohol Consumption on Age-Related Hearing Loss: The Blue Mountains Hearing Study. *Ear and Hearing*. 2010; 31(2):277–82. <https://doi.org/10.1097/AUD.0b013e3181c8e902> WOS:000279368600014. PMID: 20054277
  34. Li XD, Liu YM, Li YS, Guo X, Xiao QH, He GQ, et al. Combined effects of alcohol drinking and occupational exposure to noise on hearing loss. *South China J Prev Med*. 2008; 24(3). (in Chinese).
  35. Guo Y, Sun YY, Wang H, Feng YM, Shi HB, Yin SK. Smoking, Alcohol Consumption and Occupational Noise and Hearing Impairment. *Chinese Journal of Otolaryngology*. 2016; 14(6). (in Chinese). doi: 1672–2922 (2016) 06-729-6.
  36. Jiao J, Gu GZ, Chen GS, Zheng YX, Zhang HL, Geng Q, et al. Association between serum magnesium ion level and risk of noise-induced hearing loss. *Chin J Ind Hyg Occup Dis*. 2016; 34(12):884–8. <https://doi.org/10.3760/cma.j.issn.1001-9391.2016.12.002> PMID: 28241674.
  37. Itoh A, Nakashima T, Arai H, Wakai K, Tamakoshi A, Kawamura T, et al. Smoking and drinking habits as risk factors for hearing loss in the elderly: epidemiological study of subjects undergoing routine health checks in Aichi, Japan. *Public health*. 2001; 115(3):192–6. Epub 2001/06/29. <https://doi.org/10.1038/sj.ph.1900765> PMID: 11429714.
  38. Ni QY, Zhang ZJ, Mao WM, Hu WM. Electrical audiometry results of health examination in a hospital of Shanghai. *Occup and Health*. 2019; 35(13):1737–41+46. (in Chinese). <https://doi.org/10.13329/j.cnki.zyyjk.2019.0457>
  39. Bai L, Wang H, Yang HY, Xie P, Li HY, Xia BH, et al. Logistic analysis of factors influencing noise-induced hearing loss. *Chin J Ind Hyg Occup Dis*. 2018; 36(12):918–21. (in Chinese). <https://doi.org/10.3760/cma.j.issn.1001-9391.2018.12.010>
  40. Shen HX, Shi J, Li XT, Cao JL, Zhong L, Zhu BL. Influence of smoking and drinking on noise-induced hearing loss. *Chinese J Ind Med*. 2013; 26(5). (in Chinese).
  41. Popelka MM, Cruickshanks KJ, Wiley TL, Tweed TS, Klein BE, R K, et al. Moderate Alcohol Consumption and Hearing Loss: A Protective Effect. *J Am Geriatr Soc*. 2000; 48(10):1273–8. Epub 2000/10/19. <https://doi.org/10.1111/j.1532-5415.2000.tb02601.x> PMID: 11037015.
  42. Chen Y, Bao E, Lin Y, Xue C, Su Y, Zhang C, et al. Analysis of health status of noise worker in an automobile manufacturing enterprise in Guangzhou. *Occup and Health*. 2020; 36(14):1905–8. (in Chinese). <https://doi.org/10.13329/j.cnki.zyyjk.2020.0509>

43. Zou XM, Liu S, Zhu LM, Li DY. Analysis of the current situation of hearing loss among workers in noisy working environments in a township enterprise in Changsha City. *Diet Health*. 2018; 5(36):286–7. (in Chinese). <https://doi.org/10.3969/j.issn.2095-8439.2018.36.368>
44. Sun HL, Zhang XQ. Influence of Smoking and Alcohol Drinking on Hearing Loss Among Workers Exposed to Industrial Noise. *J Prev Med Inf*. 2014; 30(5). (in Chinese).
45. Gao S. Status and influencing factors of hearing loss in middle-aged and elderly community residents *Chin J of Public Health Eng*. 2019; 18(01):60–2. (in Chinese). <https://doi.org/10.19937/j.issn.1671-4199.2019.01.021>
46. Xu Y, Liu J, Dong C, Guo ST, Cao H, Zhang J, et al. Hearing Status of Low-Income, Middle-Aged and Elderly Women in Northern China: A Population-Based, Cross-Sectional Study. *Journal of Multidisciplinary Healthcare*. 2021; 14:2617–24. <https://doi.org/10.2147/JMDH.S323884> WOS:000701148000001. PMID: 34584418
47. Wang QX, Wang XL, Yang L, Han K, Huang ZW, Wu H. Sex differences in noise-induced hearing loss: a cross-sectional study in China. *Biol Sex Differ*. 2021; 12(1):24. Epub 2021/03/08. <https://doi.org/10.1186/s13293-021-00369-0> PMID: 33676563; PubMed Central PMCID: PMC7937304.
48. Houston DK, Johnson MA, Nozza RJ, Gunter EW, Shea KJ, Cutler GM, et al. Age-related hearing loss, vitamin B-12, and folate in elderly women. *Am J Clin Nutr*. 1999; 69(3):564–71. <https://doi.org/10.1093/ajcn/69.3.564> PMID: 10075346.
49. Halsted CH, Villanueva JA, Devlin AM, Chandler CJ. Metabolic interactions of alcohol and folate. *J Nutr*. 2002; 132(8 Suppl):2367S–72S. <https://doi.org/10.1093/jn/132.8.2367S> PMID: 12163694.
50. Ribeiro SBA, Jacob LCB, Alvarenga KdF, Marques JM, Campêlo RM, Tschoeke SN. Auditory assessment of alcoholics in abstinence. *Brazilian journal of otorhinolaryngology*. 2007; 73(4):452–62. [https://doi.org/10.1016/s1808-8694\(15\)30097-5](https://doi.org/10.1016/s1808-8694(15)30097-5) PMID: 17923916.
51. Roberto M, Gilpin NW, Siggins GR. The central amygdala and alcohol: role of  $\gamma$ -aminobutyric acid, glutamate, and neuropeptides. *Cold Spring Harbor perspectives in medicine*. 2012; 2(12):a012195. <https://doi.org/10.1101/cshperspect.a012195> PMID: 23085848.
52. Arnold T, Oestreicher E, Ehrenberger K, Felix D. GABA(A) receptor modulates the activity of inner hair cell afferents in guinea pig cochlea. *Hearing research*. 1998; 125(1–2):147–53. [https://doi.org/10.1016/s0378-5955\(98\)00144-0](https://doi.org/10.1016/s0378-5955(98)00144-0) PMID: 9833968.
53. Kähkönen S, Martinen Rossi E, Yamashita H. Alcohol impairs auditory processing of frequency changes and novel sounds: a combined MEG and EEG study. *Psychopharmacology (Berl)*. 2005; 177(4):366–72. <https://doi.org/10.1007/s00213-004-1960-1> PMID: 15290001.
54. Nakamura M, Aoki N, Nakashima T, Hoshino T, Yokoyama T, Morioka S, et al. Smoking, alcohol, sleep and risk of idiopathic sudden deafness: a case-control study using pooled controls. *Journal of epidemiology*. 2001; 11(2):81–6. <https://doi.org/10.2188/jea.11.81> PMID: 11388497.
55. Meerton LJ, Andrews PJ, Upile T, Drenovak M, Graham JM. A prospective randomized controlled trial evaluating alcohol on loudness perception in cochlear implant users. *Clinical otolaryngology: official journal of ENT-UK; official journal of Netherlands Society for Oto-Rhino-Laryngology & Cervico-Facial Surgery*. 2005; 30(4):328–32. <https://doi.org/10.1111/j.1365-2273.2005.00998.x> PMID: 16209674.
56. Fitzpatrick D, Eviatar A. The effect of alcohol on central auditory processing (comparison with marijuana). *The Journal of otolaryngology*. 1980; 9(3):207–14. PMID: 7431467.
57. Someya S, Yu W, Hallows WC, Xu J, Vann JM, Leeuwenburgh C, et al. Sirt3 mediates reduction of oxidative damage and prevention of age-related hearing loss under caloric restriction. *Cell*. 2010; 143(5):802–12. <https://doi.org/10.1016/j.cell.2010.10.002> PMID: 21094524.
58. Seidman MD, Quirk WS, Shirwany NA. Mechanisms of alterations in the microcirculation of the cochlea. *Annals of the New York Academy of Sciences*. 1999; 884:226–32. <https://doi.org/10.1111/j.1749-6632.1999.tb08644.x> PMID: 10842596.
59. Collins MA, Neafsey EJ, Mukamal KJ, Gray MO, Parks DA, Das DK, et al. Alcohol in moderation, cardioprotection, and neuroprotection: epidemiological considerations and mechanistic studies. *Alcoholism, clinical and experimental research*. 2009; 33(2):206–19. <https://doi.org/10.1111/j.1530-0277.2008.00828.x> PMID: 19032583.
60. Saunders JB, Aasland OG, Babor TF, de la Fuente JR, Grant M. Development of the Alcohol Use Disorders Identification Test (AUDIT): WHO Collaborative Project on Early Detection of Persons with Harmful Alcohol Consumption—II. *Addiction (Abingdon, England)*. 1993; 88(6):791–804. <https://doi.org/10.1111/j.1360-0443.1993.tb02093.x> PMID: 8329970.
61. Bush K, Kivlahan DR, McDonnell MB, Fihn SD, Bradley KA. The AUDIT alcohol consumption questions (AUDIT-C): an effective brief screening test for problem drinking. *Ambulatory Care Quality Improvement Project (ACQUIP). Alcohol Use Disorders Identification Test*. *Arch Intern Med*. 1998; 158(16):1789–95. <https://doi.org/10.1001/archinte.158.16.1789> PMID: 9738608.
